# Supplementary material
Source: HighWire-hosted journal article supplement (https://bmjopen.bmj.com/content/9/7/e029433)
Supplement: inline-supplementary-material-1 [file inline-supplementary-material-1.pdf]

### Appendix 1.

The most cited articles in medical professionalism identified by searching the Web of Science, showing the number of citations and altmetric scores<sup>a</sup>

| Rank | Authors, Year [Reference]               | Article ( <i>Journal</i> )                                                                                                                                           | 2015-JIF | Category           | Number of citations, Web of Knowledge | Average citation per year <sup>b</sup> | Altmetric scores <sup>c</sup> | Origin: First author's organization, location (country)                                       |
|------|-----------------------------------------|----------------------------------------------------------------------------------------------------------------------------------------------------------------------|----------|--------------------|---------------------------------------|----------------------------------------|-------------------------------|-----------------------------------------------------------------------------------------------|
| 1    | Epstein and Hundert, 2002 <sup>30</sup> | Defining and assessing professional competence. ( <i>Journal of the American Medical Association</i> ).                                                              | 37.684   | Review             | 947                                   | 63.13                                  | 24                            | University of Rochester School of Medicine and Dentistry, Rochester, New York (United States) |
| 2    | Blank et al, 2003 <sup>31</sup>         | Medical professionalism in the new millennium: a physician charter 15 months later. ( <i>Annals of Internal Medicine</i> ).                                          | 16.593   | Editorial Material | 804                                   | 53.60                                  | 2                             | ABIM Foundation, 510 Walnut Street, Suite 1700, Philadelphia, Pennsylvania, (United States)   |
| 3    | Epstein, 1999 <sup>32</sup>             | Mindful practice. ( <i>Journal of the American Medical Association</i> ).                                                                                            | 37.684   | Review             | 588                                   | 32.66                                  | 12                            | University of Rochester School of Medicine and Dentistry, Rochester, New York (United States) |
| 4    | Brennan et al, 2006 <sup>33</sup>       | Health industry practices that create conflicts of interest: a policy proposal for academic medical centers. ( <i>Journal of the American Medical Association</i> ). | 37.684   | Article            | 400                                   | 36.36                                  | 37                            | Brigham and Women's Hospital, Harvard Medical School, Boston, Massachusetts (United States)   |
| 5    | Papadakis, et al, 2005 <sup>34</sup>    | Disciplinary action by medical boards and prior behavior in medical school. ( <i>New England Journal of Medicine</i> ).                                              | 59.558   | Research           | 313                                   | 26.08                                  | 34                            | School of Medicine, University of California, San Francisco, San Francisco, (United States).  |

|    |                                     |                                                                                                                                                    |        |          |     |       |     |                                                                                                                                                         |
|----|-------------------------------------|----------------------------------------------------------------------------------------------------------------------------------------------------|--------|----------|-----|-------|-----|---------------------------------------------------------------------------------------------------------------------------------------------------------|
|    |                                     |                                                                                                                                                    |        |          |     |       |     |                                                                                                                                                         |
| 6  | Swick, 2000 <sup>35</sup>           | Toward a normative definition of medical professionalism. ( <i>Academic Medicine</i> ).                                                            | 4.194  | Article  | 239 | 14.05 | 0   | Institute of Medicine and Humanities, Saint Patrick Hospital and the University of Montana, Missoula ( <i>United States</i> ).                          |
| 7  | Arnold, 2002 <sup>36</sup>          | Assessing professional behavior: yesterday, today, and tomorrow. ( <i>Academic Medicine</i> )                                                      | 4.194  | Review   | 211 | 14.07 | 0   | University of Missouri-Kansas City School of Medicine, ( <i>United States</i> ).                                                                        |
| 8  | Papadakis et al, 2004 <sup>37</sup> | Unprofessional behavior in medical school is associated with subsequent disciplinary action by a state medical board. ( <i>Academic Medicine</i> ) | 4.194  | Research | 208 | 16.00 | 2   | Department of Medicine, University of California, San Francisco ( <i>United States</i> )                                                                |
| 9  | Neumann et al, 2011 <sup>38</sup>   | Empathy decline and its reasons: a systematic review of studies with medical students and residents. ( <i>Academic Medicine</i> )                  | 4.194  | Review   | 202 | 33.67 | 155 | Integrative and Anthroposophic Medicine, Faculty of Health, Department of Medicine, University of Witten/Herdecke, ( <i>Germany</i> ).                  |
| 10 | Chretien et al, 2009 <sup>39</sup>  | Online posting of unprofessional content by medical students. ( <i>Journal of the American Medical Association</i> )                               | 37.684 | Research | 179 | 22.38 | 55  | Medical Center and Department of Medicine, George Washington University School of Medicine and Health Sciences, Washington, DC ( <i>United States</i> ) |

|    |                                    |                                                                                                                                                        |        |                    |     |       |    |                                                                                                             |
|----|------------------------------------|--------------------------------------------------------------------------------------------------------------------------------------------------------|--------|--------------------|-----|-------|----|-------------------------------------------------------------------------------------------------------------|
| 11 | Kenny et al, 2003 <sup>40</sup>    | Role modeling in physicians' professional formation: reconsidering an essential but untapped educational strategy. ( <i>Academic Medicine</i> ).       | 4.194  | Article            | 176 | 12.57 | 0  | Department of Bioethics, Dalhousie University Faculty of Medicine, Halifax, Nova Scotia, (Canada).          |
| 12 | Dyrbye et al, 2010 <sup>41</sup>   | Relationship between burnout and professional conduct and attitudes among US medical students. ( <i>Journal of the American Medical Association</i> ). | 37.684 | Research           | 170 | 24.28 | 80 | Mayo Clinic College of Medicine, Rochester, Minnesota, (United States)                                      |
| 13 | Swick et al, 1999 <sup>42</sup>    | Teaching professionalism in undergraduate medical education. ( <i>Journal of the American Medical Association</i> ).                                   | 37.684 | Research           | 168 | 9.33  | 0  | Association of American Medical Colleges, Washington, DC (United States)                                    |
| 14 | Thompson et al, 2008 <sup>43</sup> | The intersection of online social networking with medical professionalism. ( <i>Journal of General Internal Medicine</i> ).                            | 3.494  | Research           | 166 | 18.44 | 19 | Department of Pediatrics, College of Medicine, University of Florida, Gainesville, Florida, (United States) |
| 15 | Wynia et al, 1999 <sup>44</sup>    | Medical professionalism in society ( <i>New England Journal of Medicine</i> )                                                                          | 59.558 | Editorial Material | 165 | 9.17  | 6  | American Medical Association, Chicago, Illinois (United States).                                            |
| 16 | Newton et al, 2008 <sup>45</sup>   | Is there hardening of the heart during medical school? ( <i>Academic Medicine</i> )                                                                    | 4.194  | Research           | 164 | 18.22 | 34 | University of Arkansas for Medical Sciences, 4301 W. Markham St., Arkansas (United States).                 |

|    |                                           |                                                                                                                                         |       |          |     |       |    |                                                                                                                 |
|----|-------------------------------------------|-----------------------------------------------------------------------------------------------------------------------------------------|-------|----------|-----|-------|----|-----------------------------------------------------------------------------------------------------------------|
| 17 | Coulehan and Williams, 2001 <sup>46</sup> | Vanquishing virtue: The impact of medical education ( <i>Academic Medicine</i> ).                                                       | 4.194 | Article  | 163 | 10.19 | 0  | Helath Science Center, State University of New York at Stony Brook, ( <i>United States</i> )                    |
| 18 | Coulehan, 2005 <sup>47</sup>              | Viewpoint. Today's professionalism: Emerging the mind but not the heart ( <i>Academic Medicine</i> ).                                   | 4.194 | Article  | 151 | 12.58 | 0  | Helath Science Center, State University of New York at Stony Brook, ( <i>United States</i> )                    |
| 19 | Thomas et al, 2007 <sup>48</sup>          | How do distress and well-being relate to medical student empathy? A multicenter study. ( <i>Journal of General Internal Medicine</i> ). | 3.494 | Research | 135 | 13.50 | 0  | Department of Internal Medicine, Mayo Clinic, Rochester, Minnesota, ( <i>United States</i> )                    |
| 20 | Hilton and Slotnick, 2005 <sup>49</sup>   | Proto-professionalism: how professionalisation occurs across the continuum of medical education. ( <i>Medical Education</i> ).          | 3.369 | Article  | 134 | 11.17 | 4  | Department of Community Health Sciences, St. George's Hospital Medical School, London ( <i>United Kingdom</i> ) |
| 21 | Cruess and Cruess, 1997 <sup>50</sup>     | Teaching medicine as a profession in the service of healing. ( <i>Academic Medicine</i> )                                               | 4.194 | Review   | 131 | 6.55  | 0  | McGill University Faculty of Medicine, Montreal, Quebec, ( <i>Canada</i> ).                                     |
| 22 | Audet et al, 2005 <sup>51</sup>           | Measure, learn, and improve: physicians' involvement in quality improvement. <i>Health Affairs (Millwood)</i> .                         | 5.230 | Article  | 126 | 10.5  | 12 | American Medical Association, Ccommonwealth Fund, New York City, NY, ( <i>United States</i> ).                  |

|    |                                      |                                                                                                                                                         |        |                    |     |       |   |                                                                                                                                     |
|----|--------------------------------------|---------------------------------------------------------------------------------------------------------------------------------------------------------|--------|--------------------|-----|-------|---|-------------------------------------------------------------------------------------------------------------------------------------|
| 23 | Wong et al, 2010 <sup>52</sup>       | Teaching quality improvement and patient safety to trainees: a systematic review. ( <i>Academic Medicine</i> )                                          | 4.194  | Review             | 122 | 17.43 | 3 | Department of Medicine, University of Toronto, Toronto, Ontario, ( <i>Canada</i> ).                                                 |
| 24 | Eva et al, 2004 <sup>53</sup>        | How can I know what I don't know? Poor self assessment in a well-defined domain. ( <i>Advances in Health Sciences Education Theory and Practices.</i> ) | 2.452  | Article            | 120 | 9.23  | 7 | Program for Educational Research and Development, Room 101, Building T-13, McMaster University, Hamilton, Ontario ( <i>Canada</i> ) |
| 25 | Campbell et al, 2007 <sup>54</sup>   | Professionalism in medicine: results of a national survey of physicians. ( <i>Annals of Internal Medicine</i> ).                                        | 16.593 | Research           | 114 | 11.40 | 7 | Massachusetts General Hospital, Institute for Health Policy, Boston, Massachusetts ( <i>United States</i> )                         |
| 26 | Littlewood et al, 2005 <sup>55</sup> | Early practical experience and the social responsiveness of clinical education: systematic review. ( <i>British Medical Journal</i> )                   | 19.697 | Review             | 111 | 9.25  | 1 | University of Manchester School of Medicine, Manchester ( <i>United Kingdom</i> ).                                                  |
| 27 | Veloski et al, 2005 <sup>56</sup>    | Measuring professionalism: a review of studies with instruments reported in the literature between 1982 and 2002. ( <i>Academic Medicine</i> ).         | 4.194  | Review             | 103 | 8.58  | 0 | Jefferson Medical College, Philadelphia, Pennsylvania ( <i>United States</i> )                                                      |
| 28 | Rothman, 2000 <sup>57</sup>          | Medical professionalism--focusing on the real issues. (New England Journal of Medicine)                                                                 | 59.558 | Editorial Material | 102 | 6.00  | 3 | Columbia University College of Physicians and Surgeons, New York, ( <i>United States</i> ).                                         |

|    |                                          |                                                                                                                                                                      |       |                    |     |      |    |                                                                                                                                                |
|----|------------------------------------------|----------------------------------------------------------------------------------------------------------------------------------------------------------------------|-------|--------------------|-----|------|----|------------------------------------------------------------------------------------------------------------------------------------------------|
| 29 | Cruess and Cruess, 2006 <sup>58</sup>    | Teaching Professionalism: general principles ( <i>Medical Teacher</i> ).                                                                                             | 2.355 | Editorial Material | 101 | 9.18 | 3  | Centre for Medical Education, Lady Meredith House, McGill University, Montreal, Quebec, ( <i>Canada</i> ).                                     |
| 30 | Kassebaum and Cutler, 1998 <sup>59</sup> | On the culture of student abuse in medical school ( <i>Academic Medicine</i> )                                                                                       | 4.194 | Article            | 101 | 5.32 | 0  | Division of Medical School Standards and Assessment, Association of American Medical Colleges (AAMC), Washington, DC ( <i>United States</i> ). |
| 31 | Wear and Castellani, 2000 <sup>60</sup>  | The development of professionalism: Curriculum matters ( <i>Academic Medicine</i> )                                                                                  | 4.194 | Article            | 100 | 5.88 | 0  | Northeastern Ohio Universities College of Medicine, Rootstown ( <i>United States</i> ).                                                        |
| 32 | Suchman et al, 2004 <sup>61</sup>        | Toward an informal curriculum that teaches professionalism. Transforming the social environment of a medical school. ( <i>Journal of General Internal Medicine</i> ) | 3.494 | Article            | 99  | 7.61 | 21 | Relationship-Centered Healthcare, Rochester, New York ( <i>United States</i> ).                                                                |
| 33 | Lynch et al, 2004 <sup>62</sup>          | Assessing professionalism: a review of the literature ( <i>Medical Teacher</i> )                                                                                     | 2.355 | Review             | 98  | 7.54 | 1  | Accreditation Council for Graduate Medical Education, Chicago, Illinois, ( <i>United States</i> )                                              |

|    |                                           |                                                                                                                                           |        |          |    |       |    |                                                                                                                                                                  |
|----|-------------------------------------------|-------------------------------------------------------------------------------------------------------------------------------------------|--------|----------|----|-------|----|------------------------------------------------------------------------------------------------------------------------------------------------------------------|
|    |                                           |                                                                                                                                           |        |          |    |       |    |                                                                                                                                                                  |
| 34 | Karnieli-Miller et al, 2010 <sup>63</sup> | Medical students' professionalism narratives: a window on the informal and hidden curriculum. ( <i>Academic Medicine</i> )                | 4.194  | Research | 97 | 13.86 | 20 | Department of Community Mental Health, Focus for Excellence in Patient-Professional Relationships in Health Care, University of Haifa, Haifa, ( <i>Israel</i> ). |
| 35 | Gruen et al, 2004 <sup>64</sup>           | Physician-citizens- Public roles and professional obligations ( <i>Journal of the American Medical Association</i> )                      | 37.684 | Article  | 97 | 7.46  | 14 | Harvard School of Public Health, Harvard Medical School, Boston, Mass, ( <i>United States</i> )                                                                  |
| 36 | Brainard and Brislen, 2007 <sup>65</sup>  | Viewpoint: Learning professionalism: A view from the trenches ( <i>Academic Medicine</i> ).                                               | 4.194  | Article  | 96 | 9.60  | 14 | University of New Mexico School of Medicine, Albuquerque, New Mexico, ( <i>United States</i> ).                                                                  |
| 37 | Steinert et al, 2005 <sup>66</sup>        | Faculty development for teaching and evaluating professionalism: from programme design to curriculum change. ( <i>Medical Education</i> ) | 3.369  | Research | 96 | 8.00  | 0  | Centre for Medical Education, Faculty of Medicine, McGill University, Lady Meredith House, Montreal, Quebec, ( <i>Canada</i> ).                                  |
| 38 | Meisel et al, 2000 <sup>67</sup>          | Seven legal barriers to end-of-life care- Myths, realities, and grains of truth ( <i>Journal of the American Medical Association</i> )    | 37.684 | Article  | 95 | 5.59  | 0  | Center for Ethics and Professionalism, American College of Physicians-American Society of Internal Medicine, Philadelphia, PA ( <i>United States</i> )           |

|    |                                     |                                                                                                                                                               |        |          |    |       |    |                                                                                                                                                  |
|----|-------------------------------------|---------------------------------------------------------------------------------------------------------------------------------------------------------------|--------|----------|----|-------|----|--------------------------------------------------------------------------------------------------------------------------------------------------|
| 39 | Hickson, et al, 2007 <sup>68</sup>  | A complementary approach to promoting professionalism: identifying, measuring, and addressing unprofessional behaviors. ( <i>Academic Medicine</i> ).         | 4.194  | Article  | 93 | 9.30  | 18 | Department of Medical Education and Administration, University Medical Center, Nashville, Tennessee ( <i>United States</i> )                     |
| 40 | Greysen et al, 2010 <sup>69</sup>   | Online professionalism and the mirror of social media ( <i>Journal of General Internal Medicine</i> ).                                                        | 3.494  | Article  | 91 | 13.00 | 61 | Yale University School of Medicine, New Haven, CT ( <i>United States</i> ).                                                                      |
| 41 | Eckles et al, 2005 <sup>70</sup>    | Medical ethics education: where are we? Where should we be going? A review. ( <i>Academic Medicine</i> )                                                      | 4.194  | Review   | 90 | 7.50  | 9  | Division of Hematology/Oncology, Indiana University School of Medicine, Indianapolis, IN ( <i>United States</i> )                                |
| 42 | Papadakis et al, 2008 <sup>71</sup> | Performance during internal medicine residency training and subsequent disciplinary action by state licensing boards. ( <i>Annals of Internal Medicine</i> ). | 16.593 | Research | 89 | 9.89  | 9  | University of California at San Francisco, San Francisco, California ( <i>United States</i> ).                                                   |
| 43 | MacDonald et al, 2010 <sup>72</sup> | Privacy, professionalism and Facebook: a dilemma for young doctors. ( <i>Medical Education</i> )                                                              | 3.369  | Research | 87 | 12.43 | 27 | Department of Psychological Medicine, University of Otago, Wellington School of Medicine and Health Sciences, Wellington ( <i>New Zealand</i> ). |



|    |                                        |                                                                                                                                                                                                                              |        |          |    |       |    |                                                                                                                                                 |
|----|----------------------------------------|------------------------------------------------------------------------------------------------------------------------------------------------------------------------------------------------------------------------------|--------|----------|----|-------|----|-------------------------------------------------------------------------------------------------------------------------------------------------|
| 44 | Patenaude et al, 2003 <sup>73</sup>    | Changes in students' moral development during medical school: a cohort study. ( <i>Canadian Medical Association Journal</i> ).                                                                                               | 6.724  | Research | 87 | 6.21  | 10 | Faculty of Medicine, University of Sherbrooke and the Centre for Clinical Research, Centre hospitalier universitaire de Sherbrooke, QC (Canada) |
| 45 | Papadakis et al, 1999 <sup>74</sup>    | A strategy for the detection and evaluation of unprofessional behavior in medical students. University of California, San Francisco School of Medicine Clinical Clerkships Operation Committee. ( <i>Academic Medicine</i> ) | 4.194  | Article  | 86 | 4.77  | 3  | University of California at San Francisco, San Francisco, California ( <i>United States</i> ).                                                  |
| 46 | Lesser et al, 2010 <sup>75</sup>       | A behavioral and systems view of professionalism ( <i>Journal of the American Medical Association</i> )                                                                                                                      | 37.684 | Article  | 83 | 11.86 | 36 | Foundation Programs, American Board of Internal Medicine Foundation, Philadelphia, Pennsylvania, ( <i>United States</i> )                       |
| 47 | Wear and Kuczewski, 2004 <sup>76</sup> | The professionalism movement: Can we pause? ( <i>American Journal of Bioethics</i> )                                                                                                                                         | 6.500  | Article  | 83 | 6.38  | 0  | College of Medicine, Northeastern Ohio Universities, ( <i>United States</i> ).                                                                  |
| 48 | Sargeant et al, 2010 <sup>77</sup>     | The process and dimensions of informed self-assessment: a conceptual model ( <i>Academic Medicine</i> )                                                                                                                      | 4.194  | Research | 82 | 11.71 | 2  | Dalhousie University, Halifax, Nova Scotia, ( <i>Canada</i> ).                                                                                  |
| 49 | Reynolds, 1994 <sup>78</sup>           | Reaffirming professionalism through the education community ( <i>Annals of Internal Medicine</i> )                                                                                                                           | 16.593 | Review   | 80 | 3.48  | 0  | Robert Wood Johnson Foundation, Clinical Scholars Program, University of Pennsylvania                                                           |

|    |                                         |                                                                                                                                    |        |          |    |       |    |                                                                                                 |
|----|-----------------------------------------|------------------------------------------------------------------------------------------------------------------------------------|--------|----------|----|-------|----|-------------------------------------------------------------------------------------------------|
|    |                                         |                                                                                                                                    |        |          |    |       |    | School of Medicine,<br>Philadelphia ( <i>United States</i> )                                    |
| 50 | Aguilar<br>et al,<br>2011 <sup>79</sup> | The “top 5” lists in primary care<br>meeting the responsibility of<br>professionalism ( <i>Archives of Internal<br/>Medicine</i> ) | 17.333 | Research | 78 | 13.00 | 61 | School of Medicine,<br>University of Colorado,<br>Aurora, Colorado ( <i>United<br/>States</i> ) |

<sup>a</sup> The search was conducted in May 2017 by searching the Web of Knowledge (1900 to 2016).

<sup>b</sup> For articles with the same number of citations, the average citation per year (number of citations/number of years since publication) was used to judge the ranking. Articles with a higher average citation per year were considered higher in ranking than an article with the same number of citations but a lower average citation per year.

<sup>c</sup> The Altmetric scores were calculated at the publisher website of each article by using the Altmetric Bookmarklet Application (<https://www.altmetric.com/products/free-tools/bookmarklet/>).
